# Supplementary material for: Floral Nectar Chemistry in Orchids: A Short Review and Meta-Analysis
Source: MDPI journal article supplement (doi:10.3390/plants10112315), 2021-10-27
Supplement: s1 [file s1]

Table S1. Properties of analyzed orchid traits, including nectar characteristics. Life form: T- terrestrial, E - epiphitic, El - epilithic; pollinators: B - bees, M - moths, H - birds, Bu - butterflies, F - flies, W- wasps, Bt - beetles, D - various; pollinator specialization: S - specialist, G - generalist; nectar presentation: S - in spur, O - in open nectaries; spur category: S - short, M - medium, L - long.

| Species                      | Subfamily      | Continent  | Life form | Pollinators | Specialist/<br>generalist | Nectar presentation | Spur length (mm) | Spur category | Sugar concentration (%) | S:G+<br>F | F:G  | Source                           |
|------------------------------|----------------|------------|-----------|-------------|---------------------------|---------------------|------------------|---------------|-------------------------|-----------|------|----------------------------------|
| <i>Acrolophia cochlearis</i> | Epidendroideae | Africa     | T         | B           | S                         | S                   | 3                | S             | 90                      | 2.33      | 0.88 | Peter & Johnson 2009             |
| <i>A. micrantha</i>          | Epidendroideae | Africa     | T         | B           | S                         | S                   | 3                | S             | 71                      | -         | -    | Peter & Johnson 2009             |
| <i>Aeranthus arachnitis</i>  | Epidendroideae | Africa     | E         | M           | S                         | S                   | -                | M             | 14.5                    | -         | -    | Roberts 2007                     |
| <i>Aerangis brachycarpa</i>  | Epidendroideae | Africa     | E         | M           | S                         | S                   | 159              | L             | 22.5                    | -         | -    | Martins & Johnson 2007           |
| <i>A. confusa</i>            | Epidendroideae | Africa     | El        | M           | S                         | S                   | 45               | M             | 23                      | -         | -    | Martins & Johnson 2007           |
| <i>A. ellisii</i>            | Epidendroideae | Africa     | E.        | M           | S                         | S                   | 158              | L             | 16.2                    | -         | -    | Nilsson & Rabakonandrianina 1988 |
| <i>A. thomsonii</i>          | Epidendroideae | Africa     | E         | M           | S                         | S                   | 135              | L             | 14                      | -         | -    | 1988                             |
| <i>A. verdickii</i>          | Epidendroideae | Africa     | E         | M           | S                         | S                   | 150              | L             | 16.35                   | -         | -    | Martins & Johnson 2007           |
| <i>Rangaeris amaniensis</i>  | Epidendroideae | Africa     | E         | M           | S                         | S                   | 156              | L             | 20.5                    | -         | -    | Koopowitz & Marchant 1998        |
| <i>Angraecum arachnites</i>  | Epidendroideae | Africa     | E         | M           | S                         | S                   | 100              | L             | 13.3                    | -         | -    | Martins & Johnson 2007           |
| <i>A. striatum</i>           | Epidendroideae | Africa     | E         | H           | S                         | S                   | 11.6             | M             | 9.7                     | -         | -    | Nilsson et al. 1985;             |
| <i>A. bracteosum</i>         | Epidendroideae | Africa     | E         | H           | S                         | S                   | 8                | S             | 9.6                     | -         | -    | Johnson & Raguso 2016            |
| <i>A. sesquipedale</i>       | Epidendroideae | Africa     | E         | M           | S                         | S                   | 333              | L             | 16.5                    | -         | -    | Micheneau et al. 2006            |
| <i>A. sororium</i>           | Epidendroideae | Africa     | El        | M           | S                         | S                   | 264              | M             | 10.3                    | -         | -    |                                  |
| <i>Beadlea dufræ</i>         |                | S. America | T         | B           | S                         | O                   | -                | -             | 60.45                   | 18.7      | 0.72 | Wasserthal 1997                  |
| <i>Bonatea cassidea</i>      | Orchidoideae   | Africa     | T         | Bu          | S                         | S                   | 20.8             | M             | 27.9                    | 67.50     | 3.29 | Wasserthal 1997                  |
| <i>B. polypodantha</i>       | Orchidoideae   | Africa     | T         | M           | S                         | S                   | 43.9             | M             | 20                      | 4.34      | 1.14 |                                  |
| <i>B. speciosa</i>           | Orchidoideae   | Africa     | T         | M           | S                         | S                   | 50               | M             | 27.3                    | -         | -    | Galetto et al. 1997              |
| <i>B. macroceras</i>         | Orchidoideae   | Africa     | T         | F           | S                         | S                   | 36.2             | M             | 30.5                    | -         | -    | Balducci et al. 2019             |
| <i>B. parviflora</i>         | Orchidoideae   | Africa     | T         | B           | S                         | S                   | 3.7              | S             | 33.43                   | -         | -    | Balducci et al. 2020             |
| <i>Caladenia arenaria</i>    | Orchidoideae   | Australia  | T         | W           | S                         | O                   | -                | -             | -                       | 19.00     | 1    | Johnson & Liltved 1997;          |
| <i>C. colorata</i>           | Orchidoideae   | Australia  | T         | W           | S                         | O                   | -                | -             | -                       | 19.00     | 1    | Ponsie et al. 2007               |
| <i>C. concolor</i>           | Orchidoideae   | Australia  | T         | W           | S                         | O                   | -                | -             | -                       | -         | -    | Larsen et al. 2008               |
| <i>C. nobilis</i>            | Orchidoideae   | Australia  | T         | W           | S                         | O                   | -                | -             | -                       | 1.00      | 1.6  | Larsen et al. 2008               |
| <i>C. paludosa</i>           | Orchidoideae   | Australia  | T         | W           | S                         | O                   | -                | -             | -                       | 2.37      | 1.02 | Reiter et al. 2019b              |
| <i>C. versicolor</i>         | Orchidoideae   | Australia  | T         | B           | S                         | O                   | -                | -             | -                       | 19.00     | 1    | Reiter et al. 2018               |
| <i>Cleisostoma yersinii</i>  | Epidendroideae | Asia       | E         | B           | S                         | S                   | 10               | S             | 74.51                   | 20.89     | 0.84 | Reiter et al. 2019b              |
| <i>Comparetia coccinea</i>   | Epidendroideae | S. America | E         | Bu          | S                         | S                   | 18               | M             | 22.5                    | -         | -    | Phillips et al. 2019             |

|                               |                |            |   |    |   |   |       |   |       |       |      |                                               |
|-------------------------------|----------------|------------|---|----|---|---|-------|---|-------|-------|------|-----------------------------------------------|
| <i>C. falcata</i>             | Epidendroideae | S. America | E | H  | S | S | 13.1  | M | 14    | -     | -    | Rodríguez-Robles et al. 1992                  |
| <i>Cynorkis uniflora</i>      | Orchidoideae   | Africa     | T | M  | S | S | -     | - | 18.4  | -     | -    | Nilsson et al. 1992                           |
| <i>Cyrtorchis arcuata</i>     | Epidendroideae | Africa     | E | M  | S | S | 33    | M | 16.65 | -     | -    | Luyt 2002                                     |
| <i>Diaphananthe caffra</i>    | Epidendroideae | Africa     | E | M  | S | S | 14    | M | 14.86 | 4.26  | 1.1  | Luyt 2002                                     |
| <i>D. millarii</i>            | Epidendroideae | Africa     | E | M  | S | S | 18.1  | M | 13.42 | -     | -    | Luyt 2002                                     |
| <i>Disa chrysostachya</i>     | Orchidoideae   | Africa     | T | H  | S | S | 7.7   | S | 9.9   | -     | -    | Johnson & Brown 2004                          |
| <i>D. cooperi</i>             | Orchidoideae   | Africa     | T | M  | S | S | 42    | M | 34.9  | 0.89  | 1.3  | Johnson 1995; Johnson 2006                    |
| <i>D. satyriopsis</i>         | Orchidoideae   | Africa     | T | H  | S | S | 10.9  | M | 14.7  | -     | -    | Johnson & Brown 2004                          |
| <i>D. scullyi</i>             | Orchidoideae   | Africa     | T | F  | S | S | 42    | M | 30.3  | 3.0   | 0.79 | Johnson 2006                                  |
| <i>Elleanthus aurantiacus</i> | Epidendroideae | S. America | T | H  | S | O | -     | - | 23.5  | -     | -    | Neubig et al. 2015                            |
| <i>E. brasiliensis</i>        | Epidendroideae | S. America | E | H  | S | O | -     | - | 21.11 | 27.90 | 1.37 | Nunes et al. 2013                             |
| <i>E. caravata</i>            | Epidendroideae | S. America | E | H  | S | O | -     | - | 26    | -     | -    | Neubig et al. 2015                            |
| <i>E. cynarocephalus</i>      | Epidendroideae | S. America | E | H  | S | O | -     | - | 13    | -     | -    | Neubig et al. 2015                            |
| <i>E. sodiroi</i>             | Epidendroideae | S. America | T | H  | S | O | -     | - | 16    | -     | -    | Neubig et al. 2015                            |
| <i>Epipactis atropurpurea</i> | Epidendroideae | Europe     | T | D  | G | O | -     | - | 20    | 0.27  | 0.8  | Pais & Neves 1980                             |
| <i>E. atropurpurea</i>        | Epidendroideae | Europe     | T | D  | G | O | -     | - | 32    | -     | -    | Pais et al. 1986                              |
| <i>Eulophia alta</i>          | Epidendroideae | S. America | T | B  | S | O | -     | - | -     | 0.80  | 1.00 | Jürgens et al. 2009                           |
| <i>Gymnadenia conopsea</i>    | Orchidoideae   | Europe     | T | Bu | S | S | 18    | M | -     | 4.20  | 0.76 | Gijbels et al. 2014                           |
| <i>G. odoratissima</i>        | Orchidoideae   | Europe     | T | F  | S | S | 4.55  | S | 15.64 | -     | -    | Sun et al. 2014                               |
| <i>Habenaria aitchisonii</i>  | Orchidoideae   | Asia       | T | M  | S | S | 9     | S | 27.11 | -     | -    | Xiong et al. 2019                             |
| <i>H. davidii</i>             | Orchidoideae   | Asia       | T | M  | S | S | 63.98 | L | 24.5  | -     | -    | Zang et al. 2017                              |
| <i>H. epipactidea</i>         | Orchidoideae   | Africa     | T | M  | S | S | 29.5  | M | 27.9  | -     | -    | Peter et al. 2009                             |
| <i>H. fordii</i>              | Orchidoideae   | Asia       | T | M  | S | S | 65.31 | L | 16.47 | -     | -    | Zang et al. 2017                              |
| <i>H. glaucifolia</i>         | Orchidoideae   | Asia       | T | M  | S | S | 25.22 | M | 30.55 | -     | -    | Xiong et al. 2015                             |
| <i>H. gourlieana</i>          | Orchidoideae   | S. America | T | M  | S | S | 133.9 | L | 14.47 | 7.94  | 0.75 | Galetto et al. 1997,<br>Singer & Cocucci 1997 |
| <i>H. hieronymi</i>           | Orchidoideae   | S. America | T | M  | S | S | 13.2  | M | 50.9  | 0.20  | 2.05 | Galetto et al. 1997;<br>Singer & Cocucci 1997 |
| <i>H. johannensis</i>         | Orchidoideae   | S. America | T | M  | S | S | 13.8  | M | 14.6  | -     | -    | Amorim et al. 2014                            |
| <i>H. johannensis</i>         | Orchidoideae   | S. America | T | M  | S | S | 130.9 | L | 24.46 | -     | -    | Pedron et al. 2012                            |
| <i>H. limprichtii</i>         | Orchidoideae   | Asia       | T | M  | S | S | 19.22 | L | 26.2  | -     | -    | Tao et al. 2018                               |
| <i>H. macronectar</i>         | Orchidoideae   | S. America | T | M  | S | S | 66.6  | L | 18.12 | -     | -    | Pedron et al. 2012                            |
| <i>H. megapotaensis</i>       | Orchidoideae   | S. America | T | M  | S | S | 75.1  | L | 19.04 | -     | -    | Pedron et al. 2012                            |
| <i>H. montevidensis</i>       | Orchidoideae   | S. America | T | Bu | S | S | 16.2  | M | 26.2  | -     | -    | Pedron et al. 2012                            |
| <i>H. paulistana</i>          | Orchidoideae   | S. America | T | M  | S | S | 12.9  | M | 19.2  | -     | -    | Amorim et al. 2014                            |
| <i>H. pleiophylla</i>         | Orchidoideae   | S. America | T | M  | S | S | 22.3  | M | 40    | -     | -    | Singer et al. 2007                            |
| <i>H. ornithoides</i>         | Orchidoideae   | S. America | T | M  | S | S | 40    | M | -     | 27.09 | 2.16 | Gottsberger et al. 1984                       |
| <i>H. rhodocheila</i>         | Orchidoideae   | Asia       | T | Bu | S | S | 41.26 | M | 20.89 | -     | -    | Chen et al. 2021                              |
| <i>Jumellea stenopylla</i>    | Epidendroideae | Africa     | E | M  | S | S | 137.9 | L | 10.7  | -     | -    | Micheneau et al. 2008                         |
| <i>Limodorum abortivum</i>    | Orchidoideae   | Europe     | T | B  | G | S | 15    | M | 16.9  | -     | -    | Pais et al. 1986; Vakhremeeva                 |
| <i>Luisia teres</i>           | Epidendroideae | Asia       | E | Bt | S | O | -     | - | 3.5   | -     | -    | Arakaki et al. 2016                           |
| <i>Maxillaria anceps</i>      | Epidendroideae | S. America | E | B  | S | O | -     | - | 66.5  | 70.86 | 0.44 | Davies et al. 2005                            |

|                                        |                |            |   |    |   |   |       |   |       |        |      |                                                 |
|----------------------------------------|----------------|------------|---|----|---|---|-------|---|-------|--------|------|-------------------------------------------------|
| <i>Mystacidium brayboniae</i>          | Epidendroideae | Africa     | E | M  | S | S | 19.4  | M | 11.42 | 46.00  | -    | Luyt 2002                                       |
| <i>M. capense</i>                      | Epidendroideae | Africa     | E | M  | S | S | 39.1  | M | 15.96 | 7.30   | 2.45 | Luyt 2002                                       |
| <i>M. flanaganii</i>                   | Epidendroideae | Africa     | E | M  | S | S | 19.6  | M | 23.6  | 1.38   | 1.21 | Luyt 2002                                       |
| <i>M. gracile</i>                      | Epidendroideae | Africa     | E | M  | S | S | 25.6  | M | 18.26 | 2.45   | 0.96 | Luyt 2002                                       |
| <i>M. pusillum</i>                     | Epidendroideae | Africa     | E | M  | S | S | 20.4  | M | 21.46 | 1.27   | 0.83 | Luyt 2002                                       |
| <i>M. pusillum</i>                     | Epidendroideae | Africa     | E | M  | S | S | 20.4  | M | 24.2  | -      | -    | Peter & Venter 2016                             |
| <i>M. tanganyikense</i>                | Epidendroideae | Africa     | E | M  | S | S | 16.8  | M | -     | 4      | 1.5  | Luyt 2002                                       |
| <i>M. venosum</i>                      | Epidendroideae | Africa     | E | M  | S | S | 47    | M | 16    | 6.70   | 3.33 | Luyt & Johnson 2001; Luyt 2002                  |
| <i>Neottia ovata</i>                   | Epidendroideae | Europe     | T | D  | G | O | -     | - | 3.39  | 0.22   | 0.88 | Brzosko et al. 2021                             |
| <i>Oeceoclades maculata</i>            | Epidendroideae | S. America | T | Bu | S | S | 5     | S | 33.73 | -      | -    | Aguiar & Pansarin; Gonzales-Dias, Ackerman 1988 |
| <i>Platanthera chlorantha</i>          | Orchidoideae   | Europe     | T | M  | S | S | 30    | M | 19.37 | -      | -    | Stpiczyńska & Pielecki 2002                     |
| <i>P. bifolia</i>                      | Orchidoideae   | Europe     | T | M  | S | S | 27.9  | M | 12.07 | 0.32   | 0.67 | Brzosko & Bajguz 2019                           |
| <i>P. chlorantha</i>                   | Orchidoideae   | Europe     | T | M  | S | S | 32.37 | M | 15.78 | 0.09   | 0.61 | Brzosko & Bajguz 2019                           |
| <i>P. ciliaris</i>                     | Orchidoideae   | N. America | T | Bu | S | S | 23.7  | M | 21    | -      | -    | Robertson & Wyatt                               |
| <i>P. praeclara</i>                    | Orchidoideae   | N. America | T | M  | S | S | 44.5  | M | 24.7  | -      | -    | Westwood et al. 2011                            |
| <i>P. stricta</i>                      | Orchidoideae   | N. America | T | D  | S | S | 3.97  | S | 8     | -      | -    | Patt et al. 1989                                |
| <i>Pelexia bonariensis</i>             | Orchidoideae   | S. America | T | B  | S | O | -     | - | 39.55 | 1.70   | 0.57 | Galetto et al. 1997                             |
| <i>Pteroglossa glazioviana</i>         | Orchidoideae   | S. America | T | Bu | S | S | 13    | M | 26.75 | -      | -    | Pansarin & Ferreira 2015                        |
| <i>P. roseoalba</i>                    | Orchidoideae   | S. America | T | Bu | S | S | 31    | M | 27.98 | -      | -    | Pansarin & Ferreira 2015                        |
| <i>Rhynchostylis retusa</i>            | Epidendroideae | Asia       | E | B  | S | S | 5     | S | 45.7  | -      | -    | Buragohain et al. 2015                          |
| <i>Rodriguezia bahiensis</i>           | Epidendroideae | S. America | E | B  | G | O | -     | - | 16.57 | -      | -    | Carvalho & Machado 2006                         |
| <i>R. granadensis</i>                  | Epidendroideae | S. America | E | B  | S | S | 26.5  | M | 33    | -      | -    | Ospina-Calderón et al. 2015                     |
| <i>R. lanceolata</i>                   | Epidendroideae | S. America | E | H  | S | S | 3     | S | 36    | -      | -    | Pansarin et al. 2018                            |
| <i>Satyrium carneum</i>                | Orchidoideae   | Africa     | E | H  | S | S | 23.4  | M | 31.2  | -      | -    | Johnson 1996                                    |
| <i>S. coriifolium</i>                  | Orchidoideae   | Africa     | T | H  | S | S | 12.3  | M | 23.6  | -      | -    | Johnson 1996; Ellis and Johnson 1999            |
| <i>S. hallackii ssp. hallackii</i>     | Orchidoideae   | Africa     | T | B  | S | S | 13.6  | M | 23.1  | 1.63   | 1    | Johnson 1997                                    |
| <i>S. hallackii ssp. ocellatum</i>     | Orchidoideae   | Africa     | T | D  | S | S | 32.8  | M | 18.9  | 2.70   | 1.08 | Johnson 1997                                    |
| <i>S. princeps</i>                     | Orchidoideae   | Africa     | E | H  | S | S | 21.9  | M | 28.6  | -      | -    | Johnson 1996                                    |
| <i>S. rhodanthum</i>                   | Orchidoideae   | Africa     | T | H  | S | S | 31.89 | M | 24.8  | -      | -    | van der Niet et al. 2015                        |
| <i>S. crassicaule</i>                  | Epidendroideae | Africa     | T | M  | S | S | 16    | M | 23.3  | 2.23   | 1.07 | Johnson et al. 2011                             |
| <i>S. cristatum var. cristatum</i>     | Epidendroideae | Africa     | T | B  | S | S | 10    | S | 27.5  | 1.63   | 0.8  | Johnson et al. 2011                             |
| <i>S. cristatum var. longilabiatum</i> | Epidendroideae | Africa     | T | B  | S | S | 10    | S | 35.1  | -      | -    | Johnson et al. 2011                             |
| <i>S. longicauda</i>                   | Epidendroideae | Africa     | T | M  | S | S | 40    | M | 31.2  | 4.00   | 1    | Johnson et al. 2011                             |
| <i>S. macrophyllum</i>                 | Epidendroideae | Africa     | T | F  | S | S | 33    | M | 27.9  | 100.00 | -    | Johnson et al. 2011                             |
| <i>S. monadenum</i>                    | Epidendroideae | Africa     | T | H  | S | S | 18    | M | 16.4  | -      | -    | Johnson et al. 2011                             |
| <i>S. neglectum</i>                    | Epidendroideae | Africa     | T | D  | G | S | 16    | M | 31.3  | 1.70   | 0.95 | Johnson et al. 2011                             |
| <i>S. parviflorum</i>                  | Epidendroideae | Africa     | T | M  | S | S | 12    | M | 15.7  | 1.94   | 1.27 | Johnson et al. 2011                             |
| <i>S. sceptrum</i>                     | Epidendroideae | Africa     | T | H  | S | S | 37.9  | M | 18.7  | 7.33   | 1    | Johnson et al. 2011                             |
| <i>S. sphaerocarpum</i>                | Epidendroideae | Africa     | T | B  | S | S | 13    | M | 24.6  | 100.00 | -    | Johnson et al. 2011                             |
| <i>S. trinerve</i>                     | Epidendroideae | Africa     | T | D  | S | S | 5.96  | S | 12.4  | -      | -    | Johnson et al. 2011                             |
| <i>Sobralia bouchei</i>                | Epidendroideae | S. America | E | B  | S | O | -     | - | 20    | -      | -    | Neubig et al. 2015                              |
| <i>S. callosa</i>                      | Epidendroideae | S. America | E | H  | S | O | -     | - | 15.75 | -      | -    | Neubig et al. 2015                              |
| <i>S. macrophylla</i>                  | Epidendroideae | S. America | E | B  | S | O | -     | - | 20    | -      | -    | Neubig et al. 2015                              |

|                                   |                |            |   |   |   |   |      |   |       |     |     |                          |
|-----------------------------------|----------------|------------|---|---|---|---|------|---|-------|-----|-----|--------------------------|
| <i>S. rosea</i>                   | Epidendroideae | S. America | T | B | S | O | -    | - | 12.25 | -   | -   | Neubig et al. 2015       |
| <i>Stenorrhynchos orchioideis</i> | Orchidoideae   | S. America | T | H | S | O | -    | - | 43.9  | 0.5 | 0.8 | Galetto et al. 1997      |
| <i>Schizochilus flexuosus</i>     | Orchidoideae   | Africa     | T | B | S | S | 4.73 | S | 30.25 | -   | -   | Van der Niet et al. 2010 |
| <i>S. zeyheri</i>                 | Orchidoideae   | Africa     | T | F | S | S | 3.36 | S | 22.1  | -   | -   | Van der Niet et al. 2010 |

Table S2. Sugar ratios in Orchidaceae in comparison with Baker and Baker (1983a) according to pollinator type. Data include the number of species studied with percentages in parentheses within the pollinator type.

| Nectar sugar ratio | Source        | Bird-pollinated species | Bee-pollinated species | Moth-pollinated species | Butterfly-pollinated species | Fly-pollinated species | Wasp-pollinated species | Generalist |
|--------------------|---------------|-------------------------|------------------------|-------------------------|------------------------------|------------------------|-------------------------|------------|
| Suchrose dominant  | Present work  | 2 (66.6)                | 9 (100)                | 14 (77.8)               | 2 (100)                      | 2 (100)                | 2 (66.6)                | 2 (50)     |
|                    | Baker & Baker | 77(55.0)                | 83 (17.8)              | 47 (45.2)               | 29 (38.7)                    |                        |                         |            |
| Sucrose rich       | Present work  | 0                       | 0                      | 1 (5.6)                 | 0                            | 0                      | 1 (33.3)                | 0          |
|                    | Baker & Baker | 45(32.1)                | 77 (16.5)              | 30 (28.8)               | 24 (32.0)                    |                        |                         |            |
| Hexose rich        | Present work  | 1 (33.3)                | 0                      | 2 (11.1)                | 0                            | 0                      | 0                       | 2 (50)     |
|                    | Baker & Baker | 18 (12.8)               | 178 (38.2)             | 22 (21.1)               | 17 (22.6)                    |                        |                         |            |
| Hexose dominant    | Present work  | 0                       | 0                      | 1 (5.6)                 | 0                            | 0                      | 0                       | 0          |
|                    | Baker & Baker | 0(0)                    | 128 (27.5)             | 5 (4.8)                 | 5 (6.6)                      |                        |                         |            |

Table S3. Composition and performance of linear models explaining the logarithm of sugar concentration in flowers of 106 orchid species

| # | Variables included                  | df | AIC    | ΔAIC  |
|---|-------------------------------------|----|--------|-------|
| 1 | Continent + climatic zone + habitat | 11 | 152.00 | 28.66 |

|   |                                                                                      |    |        |       |
|---|--------------------------------------------------------------------------------------|----|--------|-------|
| 2 | Pollinator type + pollinator match + spur type                                       | 12 | 136.30 | 12.96 |
| 3 | Continent + climatic zone + habitat + pollinator type + pollinator match + spur type | 21 | 126.84 | 3.50  |
| 4 | Continent + climatic zone + pollinator type + spur type                              | 17 | 123.34 | 0     |

Table S4. Results of the Kruskal–Wallis tests comparing sugar ratios in the nectar of orchid species depending on their geographic location, habitat, and pollination mode.

| Factor                             | $\chi^2$ | df | p      |
|------------------------------------|----------|----|--------|
| <i>Saccharose to hexoses ratio</i> |          |    |        |
| Continent                          | 8.07     | 3  | 0.044  |
| Climatic zone                      | 10.99    | 2  | 0.0041 |
| Habitat                            | 2.58     | 1  | 0.11   |
| Pollinator type                    | 6.83     | 5  | 0.23   |
| Pollinator match                   | 0.73     | 1  | 0.39   |
| Spur type                          | 0.75     | 3  | 0.86   |
| <i>Fructose to glucose ratio</i>   |          |    |        |
| Continent                          | 8.34     | 3  | 0.039  |
| Climatic zone                      | 4.13     | 2  | 0.13   |
| Habitat                            | 1.23     | 1  | 0.27   |
| Pollinator type                    | 9.59     | 5  | 0.088  |
| Pollinator match                   | 2.06     | 1  | 0.16   |
| Spur type                          | 7.68     | 3  | 0.053  |

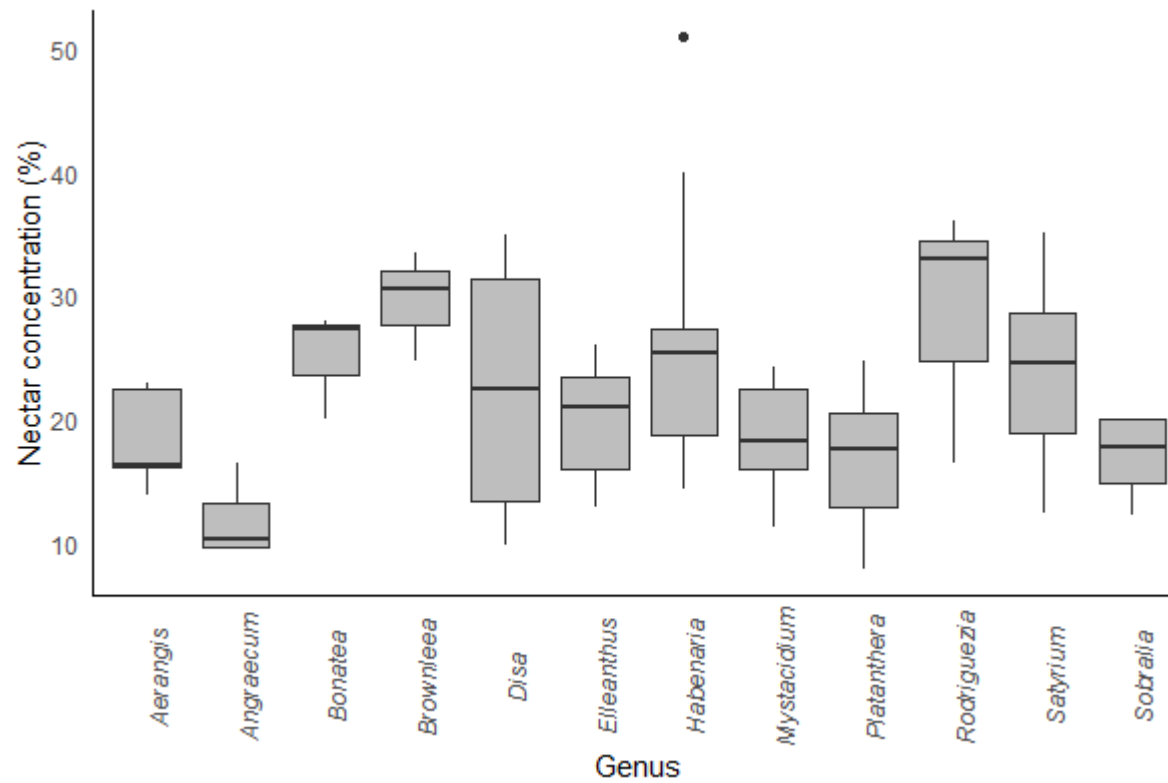

Figure S1. Variance in sugar concentration in flowers of different genera in Orchidaceae family

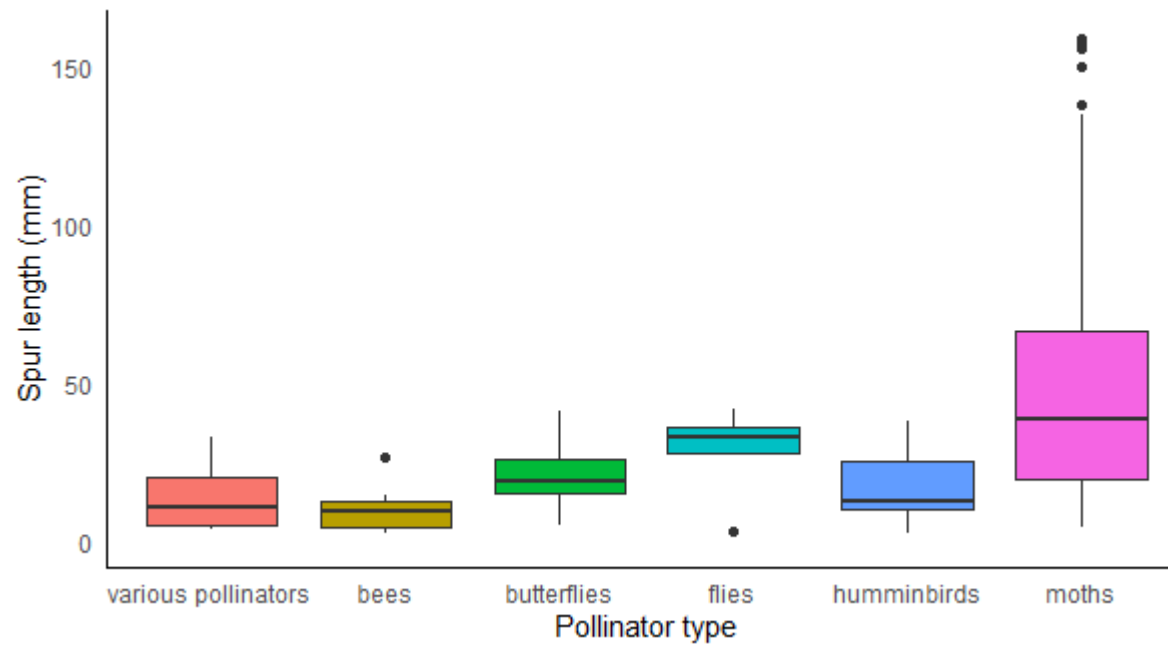

Figure S2. Spur length of different pollinator groups of 105 orchids included in our meta-analysis of nectar composition of the Orchidaceae (the single species pollinated by beetles was omitted).
